# Supplementary material for: Neuronal expression in Drosophila of an evolutionarily conserved metallophosphodiesterase reveals pleiotropic roles in longevity and odorant response
Source: PubMed Central journal article supplement (PMC10547211; doi:10.1371/journal.pgen.1010962), 2023-09-21
Supplement: pgen.1010962.s007.pdf [file pgen.1010962.s007.pdf]

S5 Fig

Odorant-binding protein expression in *dMPPED<sup>KO</sup>* flies.

A

| FlyBase id  |         |                             | Gene Name | Log2FC    | FDR       |
|-------------|---------|-----------------------------|-----------|-----------|-----------|
| FBgn0030985 | CG15883 | Odorant-binding protein 18a | Obp18a    | 1.3217285 | 0.0025632 |
| FBgn0031109 | CG11748 | Odorant-binding protein 19a | Obp19a    | 3.7733603 | 0.0071573 |
| FBgn0011283 | CG6641  | Odorant-binding protein 28a | Obp28a    | 5.2609400 | 0.0000003 |
| FBgn0034468 | CG11797 | Odorant-binding protein 56a | Obp56a    | 2.5089205 | 0.0000001 |
| FBgn0034474 | CG13873 | Odorant-binding protein 56g | Obp56g    | 2.2567858 | 0.0025970 |
| FBgn0034766 | CG13517 | Odorant-binding protein 59a | Obp59a    | 4.6648250 | 0.0000469 |
| FBgn0011281 | CG11421 | Odorant-binding protein 83a | Obp83a    | 6.7681838 | 0.0000043 |
| FBgn0010403 | CG11422 | Odorant-binding protein 83b | Obp83b    | 4.7873590 | 0.0014813 |
| FBgn0039682 | CG7584  | Odorant-binding protein 99c | Obp99c    | 0.6571736 | 0.0027950 |

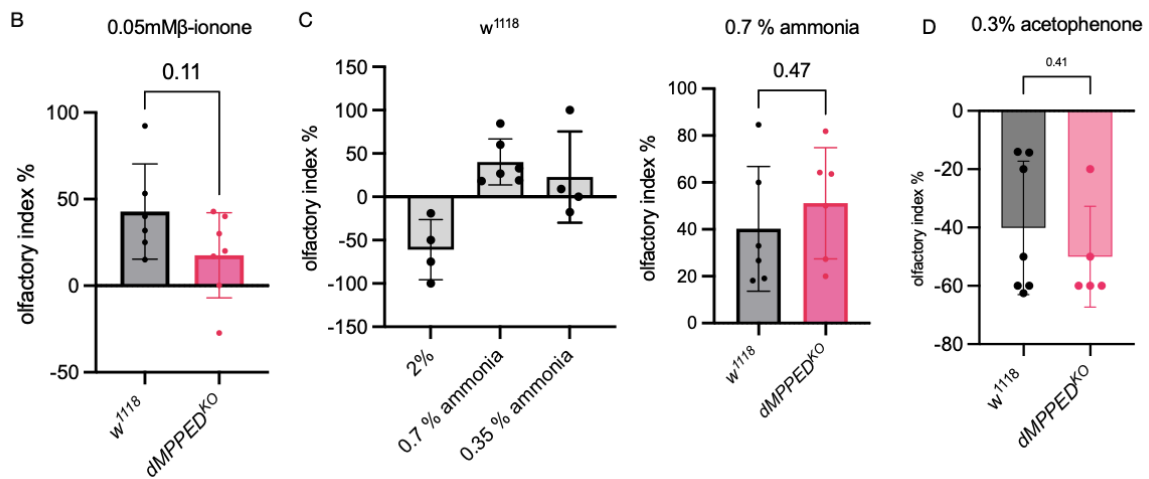

(A) Log2 FC and FDR of Obp specifically upregulated in *dMPPED<sup>KO</sup>* flies obtained from RNAseq analysis. (B) *w<sup>1118</sup>* and *dMPPED<sup>KO</sup>* flies respond similarly to 0.05 mM β-ionone, an attractant. Data is shown from 6 independent trials (*w<sup>1118</sup>* and *dMPPED<sup>KO</sup>* flies, 102 of each). Data was analyzed using a t-test. (C) Response of control and *dMPPED<sup>KO</sup>* flies to ammonia, whose behavioral response is mediated by ionotropic odorant receptors. 0.7% ammonia is an attractant (87 flies across 6 trials), while a concentration of 2% (49 flies across 4 trials) is repellent. Flies show no preference to a concentration of 0.35% (51 flies across 4 experiments). Therefore, 0.7% ammonia was used to test the response of *dMPPED<sup>KO</sup>* flies. (D) Response of control and *dMPPED<sup>KO</sup>* flies to a repellent, acetophenone, that is dependent on expression of *Obp56f*, *Obp56h* and *Obp83a* [2], none of which were misregulated in *dMPPED<sup>KO</sup>* flies. Data shown is from at least 5 trials (*w<sup>1118</sup>* 69 and *dMPPED<sup>KO</sup>* 50 flies). Data was analyzed using a t-test.
